# Anti-tubercular activity of novel 4-anilinoquinolines and 4-anilinoquinazolines

Christopher R. M. Asquith<sup>a,b</sup>, Neil Fleck<sup>c</sup>, Chad D. Torrice<sup>d</sup>, Daniel J. Crona<sup>d,e</sup>, Christoph Grundner<sup>c,f,\*</sup>, William J. Zuercher<sup>b,c,\*</sup>

<sup>a</sup>Department of Pharmacology, School of Medicine, University of North Carolina at Chapel Hill, Chapel Hill, NC 27599, USA

<sup>b</sup>Structural Genomics Consortium, UNC Eshelman School of Pharmacy, University of North Carolina at Chapel Hill, Chapel Hill, NC 27599, USA

<sup>c</sup>Seattle Children's Research Institute, Seattle, WA 98101, USA

<sup>d</sup>Division of Pharmacotherapy and Experimental Therapeutics, UNC Eshelman School of Pharmacy, University of North Carolina at Chapel Hill, Chapel Hill, NC 27599, USA.

<sup>e</sup>Lineberger Comprehensive Cancer Center, University of North Carolina at Chapel Hill, Chapel Hill, NC 27599, USA

<sup>f</sup>Department of Global Health, University of Washington, Seattle, WA 98195, USA.

## ARTICLE INFO

## ABSTRACT

### Article history:

Received

Revised

Accepted

Available online

### Keywords:

Anti-tubercular

4-anilinoquinoline

4-anilinoquinazoline

*Mycobacterium tuberculosis* (*Mtb*)

We screened a series of 4-anilinoquinolines and 4-anilinoquinazolines and identified novel inhibitors of *Mycobacterium tuberculosis* (*Mtb*). The focused 4-anilinoquinoline/quinazoline scaffold arrays yielded compounds with high potency and the identification of 6,7-dimethoxy-*N*-(4-((4-methylbenzyl)oxy)phenyl)quinolin-4-amine (**34**) with an MIC<sub>90</sub> value of 0.63-1.25  $\mu$ M. We also defined a series of key structural features, including the benzyloxy aniline and the 6,7-dimethoxy quinoline ring, that are important for *Mtb* inhibition. Importantly the compounds showed very limited toxicity and scope for further improvement by iterative medicinal chemistry.

*Mycobacterium tuberculosis* (*Mtb*), the causative agent of tuberculosis (TB) in humans,<sup>1</sup> infects nearly a third of the earth's population and caused 1.6 million worldwide deaths in 2017.<sup>2</sup> With nearly ten million new cases of active disease each year, TB is now the leading cause of death from infectious disease globally.<sup>2</sup> Current therapeutic strategies involve the use of a combination of anti-microbial agents including ethambutol, isoniazid, pyrazinamide and rifampicin (Fig. 1).<sup>3</sup> However, more than 5% of *Mtb* infections now involve multidrug-resistant (MDR-TB) and

Human protein kinases are pharmacologically tractable enzymes targeted by more than three dozen approved medicines.<sup>5</sup> Hundreds of additional kinase inhibitors are under clinical and preclinical investigation. There is growing recognition that pathogen kinases may be targeted in the treatment of infectious diseases.<sup>6-7</sup> Considering the conserved ATP-binding site across species, we looked to screen collections of ATP-competitive inhibitors of human kinases for their anti-tubercular activity.

To identify new chemical starting points against *Mtb* we looked to lapatinib, gefitinib, and erlotinib as starting points which have recently been revealed to have activity against *Mtb* (Fig. 2).<sup>5,8</sup> We tested the activity of lapatinib, gefitinib, and erlotinib against *Mtb* by measuring luminescence and growth on solid medium across a series of four two-fold dilutions starting at 20  $\mu$ M (Tab 1).<sup>9-10</sup> The reduction of visible growth on solid medium demonstrated the compounds to be bactericidal.

Gefitinib treatment had no effect relative to the absence of compound. Erlotinib induced a modest effect that appeared to

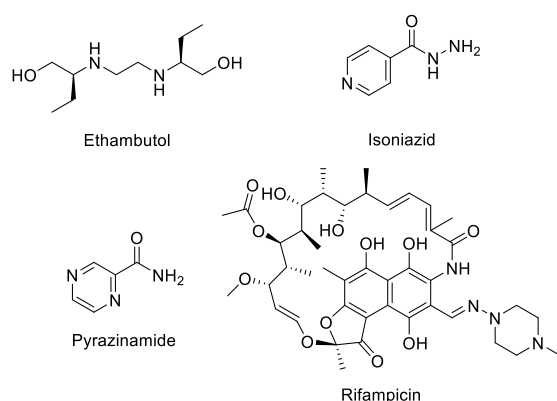

**Figure 1.** Current therapeutic strategies for treatment of *Mycobacterium tuberculosis* infections.

\* Corresponding authors: e-mail: Christoph.Grundner@seattlechildrens.org (C. Grundner), william.zuercher@unc.edu (W. J. Zuercher) extensively drug-resistant (XDR-TB) *Mtb* strains. MDR-TB is associated with a 50% mortality rate whereas XDR-TB is nearly always fatal.<sup>4</sup> There is an urgent need for new therapeutic strategies.

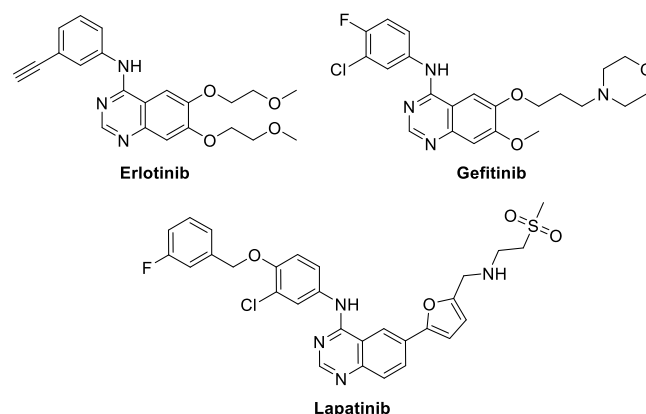

**Figure 2.** Structures of clinical quinazolines.

**Table 1.** Results of clinical inhibitors.

| Compound<br>/ $\mu\text{M}$ | <i>Mtb</i> signal <sup>a</sup> |      |      |      |      | WS-1 <sup>b</sup><br>( $\mu\text{M}$ ) |
|-----------------------------|--------------------------------|------|------|------|------|----------------------------------------|
|                             | 1.25                           | 2.5  | 5    | 10   | 20   |                                        |
| Gefitinib                   | 1.08                           | 1.09 | 1.05 | 1.08 | 1.05 | 23                                     |
| Erlotinib                   | 1.05                           | 0.96 | 0.9  | 0.68 | 0.7  | 8.6                                    |
| Lapatinib                   | 0.99                           | 0.9  | 0.74 | 0.17 | 0.08 | 13                                     |

<sup>a</sup>Relative luminescence measured at 3 days after treatment. Values = RLU(sample)/RLU(no compound) at  $\mu\text{M}$  concentrations and no effect at 0.625  $\mu\text{M}$ ; <sup>b</sup>ref<sup>11</sup>

plateau at a signal of approximately 70 %. In contrast, lapatinib showed activity even at 5  $\mu\text{M}$  and reduced the relative *Mtb* signal to below 10 % at 20  $\mu\text{M}$ . This result suggested that the 4-benzyloxy aniline substituent might be important for anti-*Mtb* activity. These compounds demonstrate only limited toxicity in a human skin fibroblast cell line (WS-1) counter screen.<sup>11</sup>

To further explore quinazoline *Mtb* activity, we profiled several focused arrays of compounds to probe the structure activity relationships of the quinoline/quinazoline. We hence synthesized a series of compounds (**1-34**) following up on the results listed in table 1, exploring the 4-anilinoquinoline and 4-anilinoquinazoline scaffolds through nucleophilic aromatic displacement of 4-chloroquin(az)olines. (Sch. 1) We were able to access products in

good to excellent yields (55-91 %) consistent with previous reports and without protection of the alcohol substituted quin(az)oline starting material.<sup>11-13</sup>

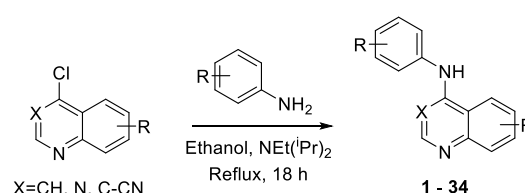

**Scheme 1.** General synthetic procedure

The first set of compounds probed a replacement of the 6-position morpholine segment of gefitinib with a simple alcohol on the lapatinib scaffold (Tab. 2).<sup>20</sup> Although neither the 6-OH (**1**) or 7-OH (**2**) quinazoline showed appreciable activity, the 6,7-dihydroxy compound (**3**) began to inhibit *Mtb* growth at higher concentrations. The analogous set of methoxy-substituted compounds (**4-6**) had very similar activity profiles. The 6-OH quinoline (**7**) showed improved activity relative to the matched quinazoline (**1**). The inclusion of fluorine substitution on the phenyl ring distal to the quinazoline (**8-10**) led to markedly increased activity for all three isomers. At 20  $\mu\text{M}$ , **8-10** all reduced

**Table 2.** Results of alcohol replacement of lapatinib and gefitinib (**1-12**).

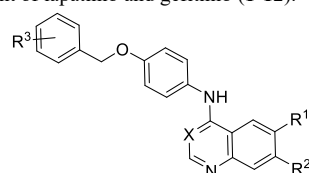

| Compound  | X  | R <sup>1</sup> | R <sup>2</sup> | R <sup>3</sup> | <i>Mtb</i> signal <sup>a</sup> ( $\mu\text{M}$ ) |      |      |      |      | WS-1 <sup>b</sup><br>( $\mu\text{M}$ ) |
|-----------|----|----------------|----------------|----------------|--------------------------------------------------|------|------|------|------|----------------------------------------|
|           |    |                |                |                | 1.25                                             | 2.5  | 5    | 10   | 20   |                                        |
| <b>1</b>  | N  | OH             | H              | H              | 0.95                                             | 0.94 | 0.96 | 0.90 | 0.80 | 26                                     |
| <b>2</b>  | N  | H              | OH             | H              | 0.90                                             | 0.90 | 0.89 | 0.88 | 0.89 | >100                                   |
| <b>3</b>  | N  | OH             | OH             | H              | 0.95                                             | 0.93 | 0.91 | 0.76 | 0.69 | 8.8                                    |
| <b>4</b>  | N  | OMe            | H              | H              | 1.04                                             | 1.07 | 0.89 | 0.83 | 0.62 | >100                                   |
| <b>5</b>  | N  | H              | OMe            | H              | 1.05                                             | 1.12 | 0.99 | 0.87 | 0.64 | >100                                   |
| <b>6</b>  | N  | OMe            | OMe            | H              | 1.04                                             | 1.04 | 0.83 | 0.77 | 0.6  | >100                                   |
| <b>7</b>  | CH | OH             | H              | H              | 0.95                                             | 0.86 | 0.66 | 0.42 | 0.37 | 2.5                                    |
| <b>8</b>  | N  | OH             | H              | 4-F            | 0.86                                             | 0.76 | 0.64 | 0.44 | 0.32 | >100                                   |
| <b>9</b>  | N  | OH             | H              | 3-F            | 0.76                                             | 0.64 | 0.49 | 0.39 | 0.25 | 12                                     |
| <b>10</b> | N  | OH             | H              | 2-F            | 0.89                                             | 0.82 | 0.63 | 0.46 | 0.28 | 28                                     |
| <b>11</b> | N  | H              | OH             | 4-F            | 0.94                                             | 1.01 | 0.90 | 0.89 | 0.83 | >100                                   |
| <b>12</b> | N  | OH             | OH             | 4-F            | 1.04                                             | 1.14 | 1.00 | 0.89 | 0.76 | >100                                   |

<sup>a</sup>Relative luminescence measured at 3 days after treatment. Values = RLU(sample)/RLU(no compound) at  $\mu\text{M}$  concentrations and no effect at 0.625  $\mu\text{M}$ ; <sup>b</sup>IC<sub>50</sub> (mean average n=4), 48 h

**Table 3.** Matched pair comparison of structures similar to erlotinib and lapatinib (**13-28**).

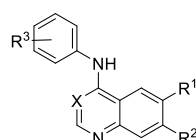

| Compound  | R <sup>1</sup>  | R <sup>2</sup> | X  | R <sup>3</sup>           | <i>Mtb</i> signal <sup>a,b</sup> |                  |                  | WS-1 <sup>c</sup><br>( $\mu\text{M}$ ) |
|-----------|-----------------|----------------|----|--------------------------|----------------------------------|------------------|------------------|----------------------------------------|
|           |                 |                |    |                          | 5 $\mu\text{M}$                  | 10 $\mu\text{M}$ | 20 $\mu\text{M}$ |                                        |
| <b>13</b> | CF <sub>3</sub> | H              | CH | 3,4,5-(OMe) <sub>3</sub> | 1.23                             | 1.14             | 1.21             | >100                                   |
| <b>14</b> | CF <sub>3</sub> | H              | N  | 3,4,5-(OMe) <sub>3</sub> | 1.25                             | 1.12             | 1.06             | >100                                   |
| <b>15</b> | Br              | H              | CH | 3,4,5-(OMe) <sub>3</sub> | 1.35                             | 1.41             | 1.28             | >100                                   |

|    |                                                         |     |    |                          |      |      |      |      |
|----|---------------------------------------------------------|-----|----|--------------------------|------|------|------|------|
| 16 | OMe                                                     | OMe | CH | 3,4,5-(OMe) <sub>3</sub> | 1.26 | 1.11 | 1.06 | >100 |
| 17 | OMe                                                     | OMe | N  | 3,4,5-(OMe) <sub>3</sub> | 1.03 | 1.01 | 0.94 | >100 |
| 18 | OMe                                                     | OMe | CN | 3,4,5-(OMe) <sub>3</sub> | 1.03 | 1.01 | 0.97 | >100 |
| 19 | 6,7-(OCH <sub>2</sub> CH <sub>2</sub> OMe) <sub>2</sub> |     | N  | 3,4,5-(OMe) <sub>3</sub> | 1.02 | 0.96 | 0.87 | >100 |
| 20 | 6,7-(OCH <sub>2</sub> CH <sub>2</sub> OMe) <sub>2</sub> |     | CH | 3-Ethynyl                | 0.88 | 0.79 | 0.58 | >100 |
| 21 | OMe                                                     | OMe | CH | 3-Ethynyl                | 1.02 | 0.89 | 0.67 | >100 |
| 22 | OMe                                                     | OMe | N  | 3-Ethynyl                | 0.93 | 0.83 | 0.69 | >100 |
| 23 | OMe                                                     | OMe | CN | 3-Ethynyl                | 1.08 | 1.03 | 0.98 | >100 |
| 24 | OMe                                                     | OMe | CH | 3-Bromo                  | 1.03 | 0.90 | 0.6  | 9.6  |
| 25 | OMe                                                     | OMe | N  | 3-Bromo                  | 0.98 | 0.71 | 0.65 | 3.9  |
| 26 | OMe                                                     | OMe | CN | 3-Bromo                  | 0.88 | 0.56 | 0.37 | 11   |
| 27 | OMe                                                     | OMe | N  | 3-Cl-4-(2-F-PhO)         | 0.92 | 0.74 | 0.80 | 1.1  |
| 28 | OMe                                                     | OMe | CH | 3-Cl-4-(2-F-PhO)         | 0.78 | 0.22 | 0.10 | 11   |

<sup>a</sup>Relative luminescence was measured at 3 days after treatment. Values = RLU(sample)/RLU(no compound); <sup>b</sup>None of the compounds reduced the relative *Mtb* signal below 95 % at 1.3 or 2.5  $\mu$ M; <sup>c</sup>IC<sub>50</sub> (mean average n = 4), 48 h

the relative *Mtb* signal to 25-37 %, and a modest but discernable reduction in signal was observed at 1.25  $\mu$ M. Interestingly, the effect of fluorine substitution led to a different activity pattern from changing quinazoline ring substitution as the modification of **1** to the 7-OH (**11**) or 6,7-(OH)<sub>2</sub> (**12**) resulted in a significant loss of activity, even at 20  $\mu$ M. These results demonstrated that *Mtb* activity was sensitive to changes at multiple parts of the template and that these changes were not necessarily additive. We counter screened **1-12** in human skin fibroblast cells (WS-1) and observed very limited toxicity with **3** and **7** the only compounds in the single digit micromolar range (IC<sub>50</sub> = 8.8 and 2.5  $\mu$ M respectively).<sup>15</sup>

The next set of quin(az)olines profiled was prepared to explore the contributions from both the aniline and the core heterocycle (Tab. 3).<sup>11,16</sup> The larger 3,4,5-trimethoxyphenyl aniline was employed on several diversely substituted quinolines and quinazolines (**13-18**) which led to no observable activity except when paired with the 6,7-(OCH<sub>2</sub>CH<sub>2</sub>OMe)<sub>2</sub>-quinazoline of erlotinib (**19**) which had only slight activity at 20  $\mu$ M. On the other hand, incorporation of the aniline fragment from erlotinib (3-ethynylphenyl) did yield several active compounds, including the quinoline analog of erlotinib (**20**). The erlotinib aniline with a 6,7-(OMe)<sub>2</sub>-substituted quinoline core (**21**) or quinazoline (**22**) showed activity but not with the 3-cyanoquinoline (**23**). The analogous 3-bromophenyl aniline compounds (**24-26**) showed higher activity than the paired 3-ethynylphenyl compounds. Finally, the aniline substitution from lapatinib (3-Cl-4-(2-F-PhO)Ph) yielded a marginally active quinazoline (**27**) and a highly active quinoline (**28**) that had 10 % *Mtb* signal at 20  $\mu$ M. We counter screened **13-28** in WS-1 cells and observed limited toxicity in most compounds. However, the bromine substitution appeared to increase toxicity (**24-26**) along with the lapatinib derivatives (**27-28**).

A subsequent set of compounds explored features of the 4-benzyloxyaniline portion of the quinoline template (Tab. 4).<sup>17-18</sup> Variation of the ether linkage to an amide and addition of a hydroxy on the aniline portion revealed an activity pattern where

6,7-dimethoxy substitution with the benzylic arm was active (**29-30**). In contrast, truncation of the benzyl also removed the activity as in acetamide **31**, which had no effect on *Mtb*. The 6-methoxy (**32**) and 7-methoxy (**33**) showed no reduction in *Mtb* signal at 20  $\mu$ M. However, switching back to the 4-methyl benzyl ether linked compound **34** yielded the most potent activity observed with any compound in the present study, with a robust signal observed even at 1.25  $\mu$ M. The *Mtb* MIC<sub>90</sub> for **34** was in the 0.63-1.25  $\mu$ M range. However, the kill curve plateaued at 5  $\mu$ M, and no improved killing was observed at higher doses (98 % inhibition at 5  $\mu$ M; 98 % inhibition at 20  $\mu$ M) (Fig. 3).

As with the other compound sets, we evaluated **29-34** in human skin fibroblast cells (WS-1) and observed moderate toxicity in the single digit micromolar range for most compounds.<sup>20</sup> Importantly, the anti-*Mtb* effects of compounds appeared to be divergent from the toxic effects in WS-1 cells, suggesting that the *Mtb* effects were not driven by nonspecific cytotoxicity. The most potent anti-*Mtb* compound **34** had WS-1 IC<sub>50</sub> = 5.4  $\mu$ M, substantially higher than its *Mtb* MIC<sub>90</sub> value and within threefold of the IC<sub>50</sub> values for erlotinib and lapatinib. This result demonstrated that, in the human WS-1 cell line, **34** behaved comparably to two approved medicines.

These structure activity relationships between *Mtb* activity and the 4-anilinoquinoline/quinazoline scaffold have the potential to inform a medicinal chemistry strategy for enhanced *Mtb* activity. The most sensitive structural changes were found to be in the ring appended to the aniline rather than in the quin(az)oline core.

This body of work provides a number of exciting starting points for further optimization, with limited non-specific toxicity. However, the failure to achieve complete parasite kill led us to deprioritize the series due to the potential for resistance to develop. The mechanism of anti-*Mtb* activity of the quin(az)olines has yet to be defined. These compounds were originally prepared as inhibitors of human kinases targeting the ATP-binding site, a

**Table 4.** Matched pair comparison of benzyloxyaniline.

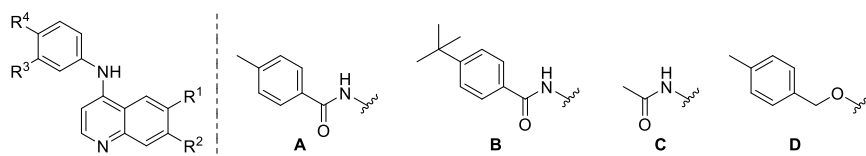

| Compound | R <sup>1</sup> | R <sup>2</sup> | R <sup>3</sup> | R <sup>4</sup> | <i>Mtb</i> signal <sup>a</sup> ( $\mu$ M) |      |      |      |      | WS-1 <sup>b</sup> ( $\mu$ M) |
|----------|----------------|----------------|----------------|----------------|-------------------------------------------|------|------|------|------|------------------------------|
|          |                |                |                |                | 1.25                                      | 2.5  | 5    | 10   | 20   |                              |
| 29       | OMe            | OMe            | OH             | A              | 1.14                                      | 1.09 | 1.13 | 1.05 | 0.45 | 16                           |

|           |     |     |    |          |      |      |      |      |      |     |
|-----------|-----|-----|----|----------|------|------|------|------|------|-----|
| <b>30</b> | OMe | OMe | OH | <b>B</b> | 1.10 | 1.12 | 1.06 | 0.72 | 0.25 | 2.6 |
| <b>31</b> | OMe | OMe | H  | <b>C</b> | 1.21 | 1.10 | 1.11 | 1.07 | 1.02 | 9.7 |
| <b>32</b> | OMe | H   | OH | <b>A</b> | 1.11 | 1.17 | 1.14 | 1.28 | 0.95 | 10  |
| <b>33</b> | H   | OMe | OH | <b>A</b> | 1.13 | 1.11 | 1.09 | 1.11 | 0.96 | 4.7 |
| <b>34</b> | OMe | OMe | H  | <b>D</b> | 0.43 | 0.17 | 0.10 | 0.08 | 0.09 | 5.4 |

<sup>a</sup>Relative luminescence was measured at 3 days after treatment. Values = RLU(sample)/RLU(no compound); <sup>b</sup>IC<sub>50</sub> (mean average n=4), 48 h

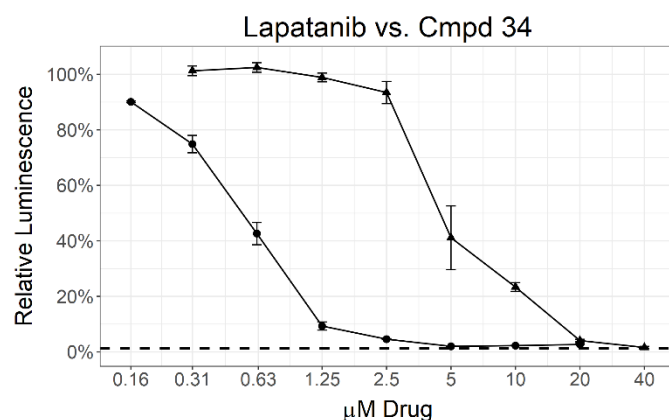

**Figure 3.** MIC determination by two different assays for **34** (circle) and lapatinib (triangle). Data points represent the mean of 3 biological replicates with standard deviation. The dashed line labeled 1% inoculum represents an inoculation of 1 % of the number of cells used for compound testing. This control was used to determine 99 % inhibition of growth.

rational starting hypothesis for the mechanism of action is that the effects of these compounds are mediated by inhibition of *Mtb* kinases. However, it is possible that the observed phenotypes may originate from modulation of other, non-kinase ATP-binding proteins in the organism.

Gefitinib, erlotinib, and lapatinib have previously been reported to inhibit the intracellular growth of *Mtb*. Multiple lines of evidence were described suggesting inhibition of the host target epidermal growth factor receptor (EGFR) was responsible for this activity.<sup>15</sup> However our results demonstrate that proteins within the pathogen itself may be targeted as well. The benzyl substituent present in the molecule showed a pivotal effect to potency, as is highlighted by the enhanced activity of **34** relative to **30**. The present results help define a de-risked medicinal chemistry trajectory towards anti-tubercular compounds with targets in both the host and the parasite itself. Such dual acting compounds might offer advantages in efficacy and/or reduction in propensity for resistance.

## Acknowledgments

The SGC is a registered charity (number 1097737) that receives funds from AbbVie, Bayer Pharma AG, Boehringer Ingelheim, Canada Foundation for Innovation, Eshelman Institute for Innovation, Genome Canada, Innovative Medicines Initiative (EU/EFPIA) [ULTRA-DD grant no. 115766], Janssen, Merck KGaA Darmstadt Germany, MSD, Novartis Pharma AG, Ontario Ministry of Economic Development and Innovation, Pfizer, São Paulo Research Foundation-FAPESP, Takeda, and Wellcome [106169/ZZ14/Z]. C. G. is supported by R01 AI117023 from the NIH/NIAID. We are grateful Dr. Brandie Ehrmann for LC-MS/HRMS support provided by the Mass Spectrometry Core Laboratory at the University of North Carolina at Chapel Hill.

## References and notes

- Pai, M.; Behr, M. A.; Dowdy, D.; Dheda, K.; Divangahi, M.; Boehme, C. C.; Ginsberg, A.; Swaminathan, S.; Spigelman, M.;

- Getahun, H.; Menzies, D.; Raviglione, M. *Nat Rev Dis Primers* **2016**, *2*, 16076.
- World Health Organization. Global Tuberculosis Report 2018 (WHO, **2018**).
- Chan, E. D.; Iseman, M. D. *BMJ*. **2002**, *325*, 1282.
- Floyd, K.; Glaziou, P.; Zumla, A.; Raviglione, M. *Lancet Respir Med* **2018**, *6*, 299.
- Ferguson, F. M.; Gray, N. S. *Nat Rev Drug Discov*. **2018**, *17*, 353.
- Sachan, M.; Srivastava, A.; Ranjan, R.; Gupta, A.; Pandya, S.; Misra, A. *Curr Pharm Des*. **2016**, *22*, 2599.
- Glennon, E. K. K.; Dankwa, S.; Smith, J. D.; Kaushansky, A. *Trends Parasitol*. **2018**, *34*, 843.
- Stanley, S. A.; Barczak, A. K.; Silvis, M. R.; Luo, S. S.; Sogi, K.; Vokes, M.; Bray, M. A.; Carpenter, A. E.; Moore, C. B.; Siddiqui, N.; Rubin, E. J.; Hung, D. T. *PLoS Pathog*. **2014**, *10*, e1003946.
- Andreu, N.; Fletcher, T.; Krishnan, N.; Wiles, S.; Robertson, B. D. *J Antimicrob Chemother*. **2012**, *67*, 404.
- An H37Rv strain containing an auto-luminescence operon (LuxABCDE) was grown to log phase, diluted and re-grown for at least 2 doublings to a final OD<sub>600</sub> of 0.005. Cultures were dispensed into 96-well white, flat-bottom plates in 100 μL final volume. Luminescence was quantified using a PHERTastar plate reader (BMG Labtech) blanked against 7H9 media.
- Asquith, C. R. M.; Naegeli, K. M.; East, M. P.; Laitinen, T.; Havener, T. M.; Wells, C. I.; Johnson, G. L.; Drewry, D. H.; Zuercher, W. J.; Morris, D. C. *J Med Chem*. **2019**, *62*, 4772.
- Asquith, C. R. M.; Laitinen, T.; Bennett, J. M.; Godoi, P. H.; East, M. P.; Tizzard, G. J.; Graves, L. M.; Johnson, G. L.; Dornsife, R. E.; Wells, C. I.; Elkins, J. M.; Willson, T. M.; Zuercher, W. J. *ChemMedChem* **2018**, *13*, 48.
- Asquith, C. R. M.; Treiber, D. K.; Zuercher, W. J. *Bioorg Med Chem Lett*. **2019**, *29*, 1727.
- General procedure for the synthesis of 4-anilinoquin(az)olines:** 4-chloroquin(az)oline derivative (1.0 eq.), aniline derivative (1.1 eq.), and <sup>18</sup>Pr<sub>2</sub>NEt (2.5 eq.) were suspended in ethanol (10 mL) and refluxed for 18 h. The crude mixture was purified by flash chromatography using EtOAc:hexane followed by 1-5 % methanol in EtOAc; After solvent removal under reduced pressure, the product was obtained as a free following solid or recrystallized from ethanol/water.  
**4-[[4-(benzyloxy)phenyl]amino]quinazolin-6-ol (1)** as a yellow solid (68 %, 220 mg, 0.640 mmol) MP 231-233 °C; <sup>1</sup>H NMR (400 MHz, DMSO-*d*<sub>6</sub>) δ 11.21 (s, 1H), 10.91 (s, 1H), 8.75 (s, 1H), 8.04 (d, *J* = 2.5 Hz, 1H), 7.88 (d, *J* = 9.0 Hz, 1H), 7.70 (dd, *J* = 9.1, 2.5 Hz, 1H), 7.62 – 7.57 (m, 2H), 7.52 – 7.44 (m, 2H), 7.44 – 7.37 (m, 2H), 7.37 – 7.30 (m, 1H), 7.14 – 7.09 (m, 2H), 5.16 (s, 2H). <sup>13</sup>C NMR (101 MHz, DMSO-*d*<sub>6</sub>) δ 158.8, 157.8, 156.7, 148.1, 136.9, 131.6, 129.7, 128.5 (2C, s), 127.9, 127.7 (2C, s), 126.5, 126.2 (2C, s), 121.2, 114.92, 114.85 (2C, s), 107.1, 69.4. HRMS *m/z* [M+H]<sup>+</sup> calcd for C<sub>21</sub>H<sub>18</sub>N<sub>3</sub>O<sub>2</sub>: 344.1399 found = 344.1386; LC *t*<sub>R</sub> = 4.24 min, >98% Purity.  
**4-[[4-(benzyloxy)phenyl]amino]quinazolin-7-ol (2)** as a light yellow solid (78 %, 223 mg, 0.648 mmol) MP 277-279 °C; <sup>1</sup>H NMR (400 MHz, DMSO-*d*<sub>6</sub>) δ 11.76 (s, 1H), 11.42 (s, 1H), 8.76 (d, *J* = 9.0 Hz, 1H), 8.74 (s, 1H), 7.59 – 7.54 (m, 2H), 7.49 – 7.44 (m, 2H), 7.42 – 7.38 (m, 2H), 7.36 – 7.28 (m, 3H), 7.12 – 7.07 (m, 2H), 5.15 (s, 2H). <sup>13</sup>C NMR (101 MHz, DMSO-*d*<sub>6</sub>) δ 164.3, 158.9, 156.6, 150.5, 140.4, 136.9, 129.7, 128.5 (2C, s), 127.9, 127.7 (2C, s), 127.1, 126.3 (2C, s), 119.4, 114.8 (2C, s), 105.8, 102.0, 69.4. HRMS *m/z* [M+H]<sup>+</sup> calcd for C<sub>21</sub>H<sub>18</sub>N<sub>3</sub>O<sub>2</sub>: 344.1399 found = 344.1386; LC *t*<sub>R</sub> = 4.33 min, >98% Purity.  
**4-[[4-(benzyloxy)phenyl]amino]quinazoline-6,7-diol (3)** as a light yellow solid (69 %, 189 mg, 0.527 mmol) MP 272-274 °C; <sup>1</sup>H NMR (400 MHz, DMSO-*d*<sub>6</sub>) δ 10.32 (s, 2H), 8.53 (s, 1H), 7.91 (s, 1H), 7.64 – 7.53 (m, 2H), 7.50 – 7.44 (m, 2H), 7.43 – 7.37 (m, 2H), 7.36 – 7.30 (m, 2H), 7.20 (s, 1H), 7.10 – 7.01 (m, 2H), 5.13 (s, 2H). <sup>13</sup>C NMR (101 MHz, DMSO-*d*<sub>6</sub>) δ 157.4, 155.7, 154.3, 149.1, 147.7, 137.1, 131.2, 128.5 (2C, s), 127.8, 127.7 (2C, s), 125.4 (2C, s), 114.7 (2C, s), 107.3, 106.7, 104.9, 69.4. HRMS *m/z* [M+H]<sup>+</sup>



calcd for C<sub>21</sub>H<sub>18</sub>N<sub>3</sub>O<sub>3</sub>: 360.1348 found = 360.1335; LC t<sub>R</sub> = 4.22 min, >98% Purity.

**N-(4-(benzyloxy)phenyl)-6-methoxyquinazolin-4-amine (4)** as a light yellow solid (84 %, 231 mg, 0.647 mmol) MP 270-272 °C; <sup>1</sup>H NMR (400 MHz, DMSO-*d*<sub>6</sub>) δ 11.64 (s, 1H), 8.79 (s, 1H), 8.41 (d, *J* = 2.6 Hz, 1H), 7.92 (d, *J* = 9.1 Hz, 1H), 7.72 (dd, *J* = 9.2, 2.5 Hz, 1H), 7.68 – 7.53 (m, 2H), 7.53 – 7.18 (m, 5H), 7.18 – 7.04 (m, 2H), 5.17 (s, 2H), 4.00 (s, 3H). <sup>13</sup>C NMR (101 MHz, DMSO-*d*<sub>6</sub>) δ 159.0 (2C, s), 156.8, 148.8, 136.9, 133.3, 129.6, 128.5 (2C, s), 127.9, 127.7 (2C, s), 126.8, 126.4 (2C, s), 121.4, 114.9 (2C, s), 114.6, 104.6, 69.4, 56.7. HRMS *m/z* [M+H]<sup>+</sup> calcd for C<sub>22</sub>H<sub>19</sub>N<sub>3</sub>O<sub>2</sub>: 357.1477 found = 358.1546; LC t<sub>R</sub> = 4.53 min, >98% Purity.

**N-[4-(benzyloxy)phenyl]-7-methoxyquinazolin-4-amine (5)** as a colourless solid (91 %, 251 mg, 0.701 mmol) MP 247-249 °C; <sup>1</sup>H NMR (400 MHz, DMSO-*d*<sub>6</sub>) δ 11.58 (s, 1H), 8.87 (d, *J* = 9.3 Hz, 1H), 8.81 (s, 1H), 7.71 – 7.57 (m, 2H), 7.58 – 7.12 (m, 7H), 7.13 – 6.99 (m, 2H), 5.15 (s, 2H), 3.97 (s, 3H). <sup>13</sup>C NMR (101 MHz, DMSO-*d*<sub>6</sub>) δ 164.7, 158.9, 156.7, 150.8, 140.7, 136.9, 129.6, 128.5 (2C, s), 127.9, 127.7 (2C, s), 127.0, 126.3 (2C, s), 118.7, 114.8 (2C, s), 107.1, 100.1, 69.4, 56.3. HRMS *m/z* [M+H]<sup>+</sup> calcd for C<sub>22</sub>H<sub>19</sub>N<sub>3</sub>O<sub>2</sub>: 357.1477 found = 358.1547; LC t<sub>R</sub> = 4.49 min, >98% Purity.

**N-(4-(benzyloxy)phenyl)-6,7-dimethoxyquinazolin-4-amine (6)** as a colourless solid (84 %, 217 mg, 0.561 mmol) MP 250-252 °C; <sup>1</sup>H NMR (400 MHz, DMSO-*d*<sub>6</sub>) δ 11.44 (s, 1H), 8.73 (s, 1H), 8.36 (s, 1H), 7.68 – 7.56 (m, 2H), 7.55 – 7.43 (m, 2H), 7.43 – 7.15 (m, 4H), 7.15 – 7.03 (m, 2H), 5.15 (s, 2H), 4.00 (s, 3H), 3.96 (s, 3H). <sup>13</sup>C NMR (101 MHz, DMSO-*d*<sub>6</sub>) δ 157.9, 156.5, 156.0, 150.0, 148.6, 137.0, 135.5, 129.9, 128.5 (2C, s), 127.9, 127.7 (2C, s), 126.3 (2C, s), 114.8 (2C, s), 107.1, 104.1, 99.8, 69.4, 57.0, 56.4. HRMS *m/z* [M+H]<sup>+</sup> calcd for C<sub>23</sub>H<sub>21</sub>N<sub>3</sub>O<sub>3</sub>: 388.1661 found = 388.1651; LC t<sub>R</sub> = 4.55 min, >98% Purity.

**4-[(4-(benzyloxy)phenyl)amino]quinolin-6-ol (7)** as a light yellow solid (64 %, 182 mg, 0.532 mmol) MP 218-220 °C; <sup>1</sup>H NMR (400 MHz, DMSO-*d*<sub>6</sub>) δ 10.67 (s, 1H), 10.37 (s, 1H), 8.32 (d, *J* = 6.8 Hz, 1H), 7.96 (d, *J* = 9.1 Hz, 1H), 7.91 (d, *J* = 2.5 Hz, 1H), 7.63 (dd, *J* = 9.1, 2.4 Hz, 1H), 7.58 – 7.44 (m, 2H), 7.46 – 7.22 (m, 5H), 7.23 – 7.13 (m, 2H), 6.57 (d, *J* = 6.8 Hz, 1H), 5.17 (s, 2H). <sup>13</sup>C NMR (101 MHz, DMSO-*d*<sub>6</sub>) δ 157.3, 156.5, 154.1, 140.1, 136.8, 132.2, 130.2, 128.5 (2C, s), 128.0, 127.8 (2C, s), 127.2 (2C, s), 124.9, 121.9, 118.7, 116.0 (2C, s), 105.4, 98.6, 69.5. HRMS *m/z* [M+H]<sup>+</sup> calcd for C<sub>22</sub>H<sub>19</sub>N<sub>3</sub>O<sub>2</sub>: 343.1447 found = 343.1433; LC t<sub>R</sub> = 4.45 min, >98% Purity.

**4-[(4-(4-fluorophenyl)methoxy)phenyl]amino]quinazolin-6-ol (8)** as a yellow solid (76 %, 228 mg, 0.631 mmol) Decomposed >200 °C; <sup>1</sup>H NMR (400 MHz, DMSO-*d*<sub>6</sub>) δ 11.22 (s, 1H), 10.91 (s, 1H), 8.75 (s, 1H), 8.05 (d, *J* = 2.5 Hz, 1H), 7.88 (d, *J* = 9.0 Hz, 1H), 7.70 (dd, *J* = 9.0, 2.4 Hz, 1H), 7.67 – 7.54 (m, 2H), 7.57 – 7.39 (m, 2H), 7.40 – 7.17 (m, 2H), 7.17 – 7.01 (m, 2H), 5.14 (s, 2H). <sup>13</sup>C NMR (101 MHz, DMSO-*d*<sub>6</sub>) δ 163.0, 159.7 (d, *J* = 175.5 Hz), 157.8, 156.6, 148.1, 133.2 (d, *J* = 3.0 Hz), 131.6, 130.0 (d, *J* = 8.3 Hz, 2C), 129.8, 126.5, 126.2 (2C, s), 121.2, 115.3 (d, *J* = 21.4 Hz, 2C), 114.93, 114.86 (2C, s), 107.1, 68.7. HRMS *m/z* [M+H]<sup>+</sup> calcd for C<sub>21</sub>H<sub>17</sub>N<sub>3</sub>O<sub>2</sub>F: 362.1305 found = 362.1290; LC t<sub>R</sub> = 4.31 min, >98% Purity.

**4-[(4-(3-fluorophenyl)methoxy)phenyl]amino]quinazolin-6-ol (9)** as a dark green solid (58 %, 174 mg, 0.482 mmol) 138-140 °C; <sup>1</sup>H NMR (400 MHz, DMSO-*d*<sub>6</sub>) δ 11.25 (s, 1H), 10.94 (s, 1H), 8.74 (s, 1H), 8.06 (d, *J* = 2.5 Hz, 1H), 7.89 (d, *J* = 9.0 Hz, 1H), 7.71 (dd, *J* = 9.0, 2.4 Hz, 1H), 7.67 – 7.49 (m, 2H), 7.45 (td, *J* = 8.0, 6.0 Hz, 1H), 7.41 – 7.22 (m, 2H), 7.21 – 6.93 (m, 3H), 5.19 (s, 2H). <sup>13</sup>C NMR (101 MHz, DMSO-*d*<sub>6</sub>) δ 162.20 (d, *J* = 243.7 Hz), 158.83, 157.80, 156.43, 148.07, 139.93 (d, *J* = 7.4 Hz), 131.62, 130.52 (d, *J* = 8.4 Hz), 129.89, 126.48, 126.26 (2C, s), 123.54 (d, *J* = 2.8 Hz), 121.14, 114.93, 114.87 (2C, s), 114.63 (d, *J* = 20.9 Hz), 114.23 (d, *J* = 21.9 Hz), 107.13, 68.57 (d, *J* = 1.9 Hz). HRMS *m/z* [M+H]<sup>+</sup> calcd for C<sub>21</sub>H<sub>17</sub>N<sub>3</sub>O<sub>2</sub>F: 362.1305 found = 362.1296; LC t<sub>R</sub> = 4.25 min, >98% Purity.

**4-[(4-(2-fluorophenyl)methoxy)phenyl]amino]quinazolin-6-ol (10)** as a dark green solid (69 %, 207 mg, 0.573 mmol) 235-237 °C; <sup>1</sup>H NMR (400 MHz, DMSO-*d*<sub>6</sub>) δ 11.23 (s, 1H), 10.91 (s, 1H), 8.75 (s, 1H), 8.05 (d, *J* = 2.5 Hz, 1H), 7.88 (d, *J* = 9.0 Hz, 1H), 7.70 (dd, *J* = 9.0, 2.4 Hz, 1H), 7.66 – 7.48 (m, 3H), 7.48 – 7.38 (m, 1H), 7.38 – 7.19 (m, 2H), 7.19 – 7.05 (m, 2H), 5.19 (s, 2H). <sup>13</sup>C NMR (101 MHz, DMSO-*d*<sub>6</sub>) 160.4 (d, *J* = 246.1 Hz), 158.8, 157.8, 156.5, 148.1, 131.7, 130.7 (d, *J* = 4.1 Hz), 130.5 (d, *J* = 8.3 Hz), 129.9, 126.5, 126.3 (2C, s), 124.6 (d, *J* = 3.5 Hz), 123.7 (d, *J* = 14.5 Hz), 121.2, 115.4 (d, *J* = 21.0 Hz), 114.9, 114.8 (2C, s), 107.1, 63.8 (d,

*J* = 3.7 Hz). HRMS *m/z* [M+H]<sup>+</sup> calcd for C<sub>21</sub>H<sub>17</sub>N<sub>3</sub>O<sub>2</sub>F: 362.1305 found = 362.1291; LC t<sub>R</sub> = 4.30 min, >98% Purity.

**4-[(4-(4-fluorobenzyl)oxy)phenyl]amino]quinazolin-7-ol (11)** as a grey solid (58 %, 174 mg, 0.482 mmol) Decomposed >300 °C; <sup>1</sup>H NMR (400 MHz, DMSO-*d*<sub>6</sub>) δ 11.74 (s, 1H), 11.38 (s, 1H), 8.81 – 8.66 (m, 2H), 7.66 – 7.38 (m, 4H), 7.29 (dd, *J* = 6.9, 2.4 Hz, 2H), 7.27 – 7.15 (m, 2H), 7.14 – 7.05 (m, 2H), 5.13 (s, 2H). <sup>13</sup>C NMR (101 MHz, DMSO-*d*<sub>6</sub>) δ 164.2, 161.8 (d, *J* = 243.7 Hz), 158.9, 156.5, 150.5, 140.5, 133.2 (d, *J* = 3.0 Hz), 130.0 (d, *J* = 8.3 Hz, 2C), 129.7, 127.1, 126.3 (2C, s), 119.4, 115.3 (d, *J* = 21.4 Hz, 2C), 114.8 (2C, s), 105.8, 102.1, 68.7. HRMS *m/z* [M+H]<sup>+</sup> calcd for C<sub>21</sub>H<sub>17</sub>N<sub>3</sub>O<sub>2</sub>F: 362.1305 found = 362.1291; LC t<sub>R</sub> = 4.44 min, >98% Purity.

**4-[(4-(4-fluorobenzyl)oxy)phenyl]amino]quinazolin-6,7-diol (12)** as a colourless solid (55 %, 158 mg, 0.420 mmol) 285-290 °C; <sup>1</sup>H NMR (400 MHz, DMSO-*d*<sub>6</sub>) δ 10.34 (s, 1H), 8.55 (s, 1H), 7.88 (s, 1H), 7.70 – 7.35 (m, 4H), 7.33 – 7.12 (m, 3H), 7.12 – 7.01 (m, 2H), 5.12 (s, 2H). <sup>13</sup>C NMR (126 MHz, DMSO-*d*<sub>6</sub>) δ 161.8 (d, *J* = 243.5 Hz), 157.4, 155.7, 154.4, 149.0, 147.7, 137.4, 133.3 (d, *J* = 8.3 Hz, 2C), 130.9, 130.0 (d, *J* = 8.4 Hz, 2C), 125.4, 115.3 (d, *J* = 21.3 Hz, 2C), 114.8 (s, 2C), 107.2, 106.8, 104.6, 68.7. HRMS *m/z* [M+H]<sup>+</sup> calcd for C<sub>21</sub>H<sub>17</sub>N<sub>3</sub>O<sub>3</sub>F: 378.1254 found = 378.1240; LC t<sub>R</sub> = 4.29 min, >98% Purity.

15. Toxicity cell assay: WS-1 cells were seeded at 400 cells/well in 384 well plates. Cells were treated with compound at 24 h after plating, and cell viability was assessed at 48 h using alamarBlue (ThermoFisher, USA). Fluorescence was measured using Tecan Infinite 200 PRO plate reader with excitation at 535 nm and emission at 590 nm. IC<sub>50</sub> values were determined by nonlinear regression using Graphpad Prism™ software.
16. Compounds **13-28** prepared as previously described.<sup>11</sup>
17. Compounds **29-34** prepared as previously described.<sup>18</sup>
18. Asquith, C. R. M.; Maffuid, K. A.; Laitinen, T.; Torrice, C. D.; Tizzard, G. J.; Koshlap, K. M.; Crona, D. J.; Zuercher, W. J. *bioRxiv* **2019**, doi: <https://doi.org/10.1101/545525>
